# Supplementary material
Source: MDPI journal article supplement (https://www.mdpi.com/2076-3417/12/4/2164)
Supplement: s1 [file s1]

## Supplementary Materials

**Table S1** List of fungi screened

| Number in collection | Species                               | Division      | Source                                                               |
|----------------------|---------------------------------------|---------------|----------------------------------------------------------------------|
| MUT 3398             | <i>Bjerkandera adusta</i>             | Basidiomycota | Mycotheca Universitatis Taurinensis (Turin, Italy)                   |
| MUT 3238             | <i>Cladosporium herbarum</i>          | Ascomycota    | Mycotheca Universitatis Taurinensis (Turin, Italy)                   |
| IBPPM 543            | <i>Fusarium oxysporum</i>             | Ascomycota    | IBPPM RAS                                                            |
| MUT4803              | <i>Geotrichum candidum</i>            | Ascomycota    | Mycotheca Universitatis Taurinensis (Turin, Italy)                   |
| IBPPM 542            | <i>Lecanicillium aphanocladii</i>     | Ascomycota    | IBPPM RAS                                                            |
| LE-BIN 2047          | <i>Lenzites betulina</i>              | Basidiomycota | Federal Research Centre “Fundamentals of Biotechnology” RAS          |
| 336                  | <i>Pleurotus ostreatus</i>            | Basidiomycota | IBPPM RAS                                                            |
| D1                   | <i>Pleurotus ostreatus</i>            | Basidiomycota | IBPPM RAS                                                            |
| IBPPM 540            | <i>Pleurotus ostreatus</i> f. Florida | Basidiomycota | IBPPM RAS                                                            |
| LE-BIN 0432          | <i>Pleurotus ostreatus</i>            | Basidiomycota | Federal Research Centre “Fundamentals of Biotechnology” RAS          |
| MUT 2977             | <i>Pleurotus ostreatus</i>            | Basidiomycota | Mycotheca Universitatis Taurinensis (Turin, Italy)                   |
| IBPPM 541            | <i>Schizophyllum commune</i>          | Basidiomycota | IBPPM RAS                                                            |
| LE-BIN 1963          | <i>Steccherinum murashkinskyi</i>     | Basidiomycota | Federal Research Centre “Fundamentals of Biotechnology” RAS          |
| DSM11372             | <i>Stropharia rugosoannulata</i>      | Basidiomycota | Helmholtz Centre for Environmental Research – UFZ (Leipzig, Germany) |
| LE-BIN 1911          | <i>Trametes gibbosa</i>               | Basidiomycota | Federal Research Centre “Fundamentals of Biotechnology” RAS          |
| LE-BIN 072           | <i>Trametes hirsuta</i>               | Basidiomycota | Federal Research Centre “Fundamentals of Biotechnology” RAS          |
| LE-BIN 0275          | <i>Trametes maxima</i>                | Basidiomycota | Federal Research Centre “Fundamentals of Biotechnology” RAS          |
| LE-BIN 093           | <i>Trametes ochracea</i>              | Basidiomycota | Federal Research Centre “Fundamentals of Biotechnology” RAS          |
| DSM11269             | <i>Trametes versicolor</i>            | Basidiomycota | Helmholtz Centre for Environmental Research – UFZ (Leipzig, Germany) |
| MUT 3403             | <i>Trametes versicolor</i>            | Basidiomycota | Mycotheca Universitatis Taurinensis (Turin, Italy)                   |

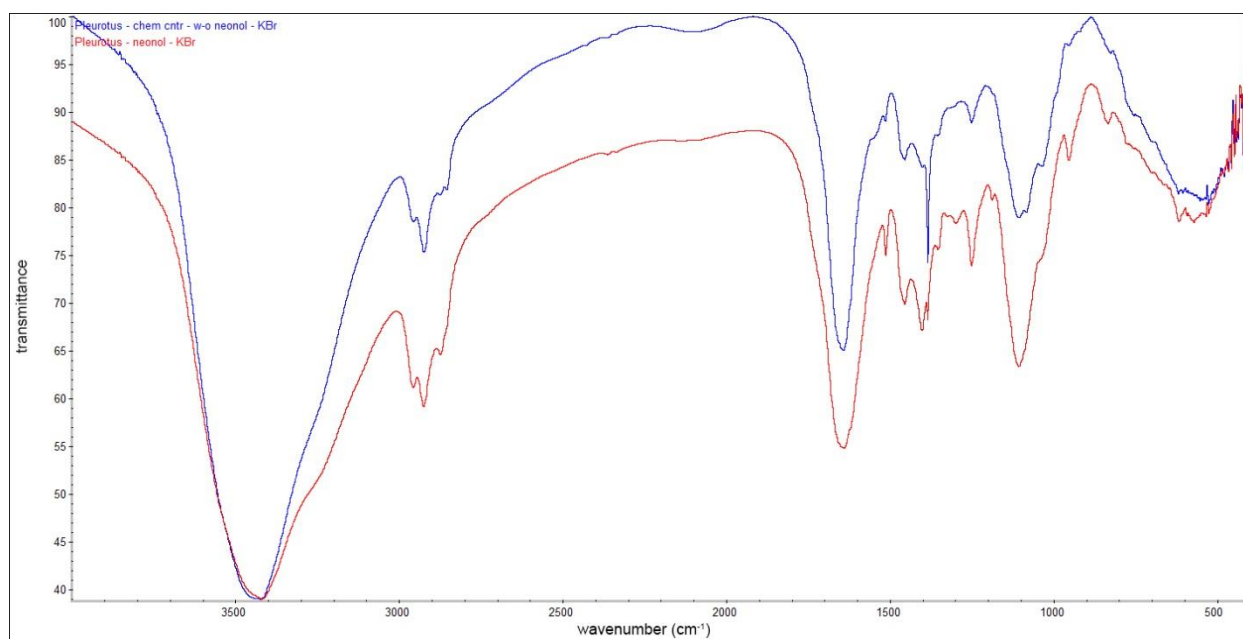

**Figure S1.** IR-spectra neonol AF9-12: control treatment (blue line) and after *P. ostreatus* Florida degradation (red line)

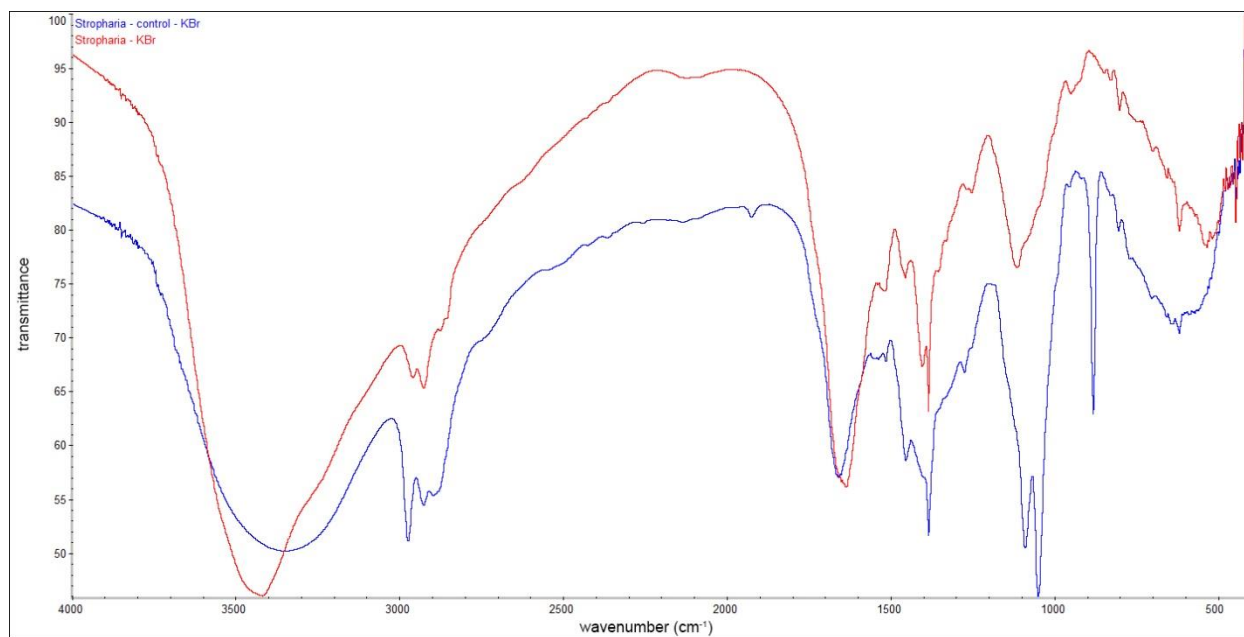

**Figure S2.** IR-spectra neonol AF9-12: control treatment (blue line) and after *S. rugosoannulata* degradation (red line)

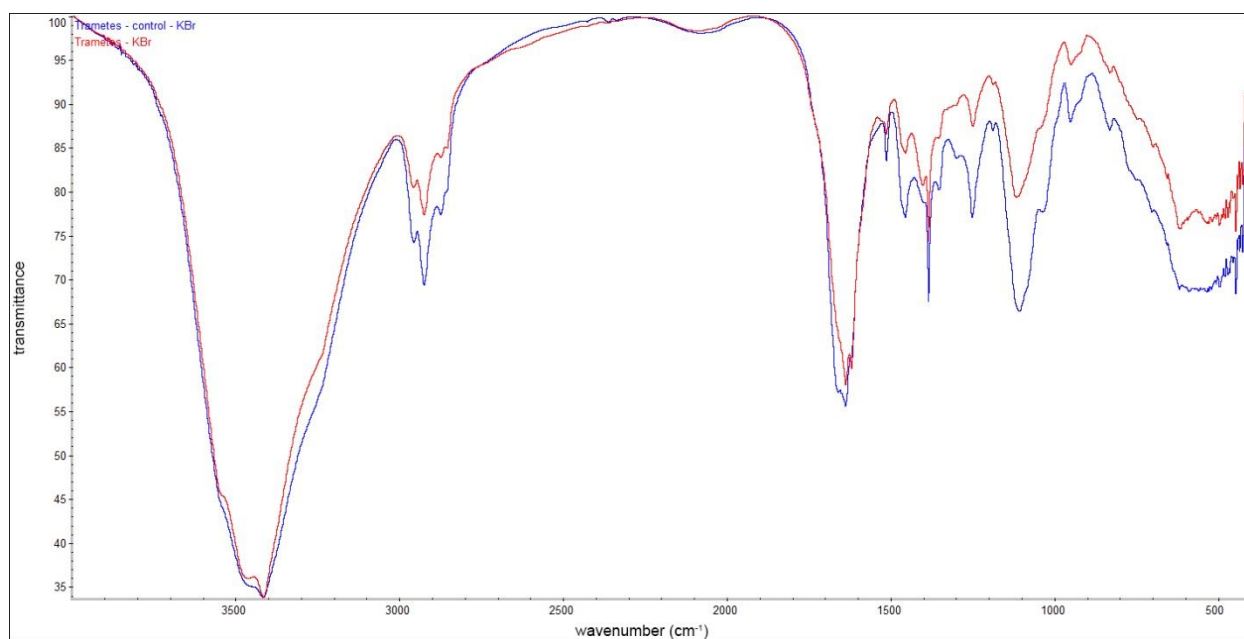

**Figure S3.** IR-spectra neonol AF9-12: control treatment (blue line) and after *T. versicolor* DSM degradation (red line)

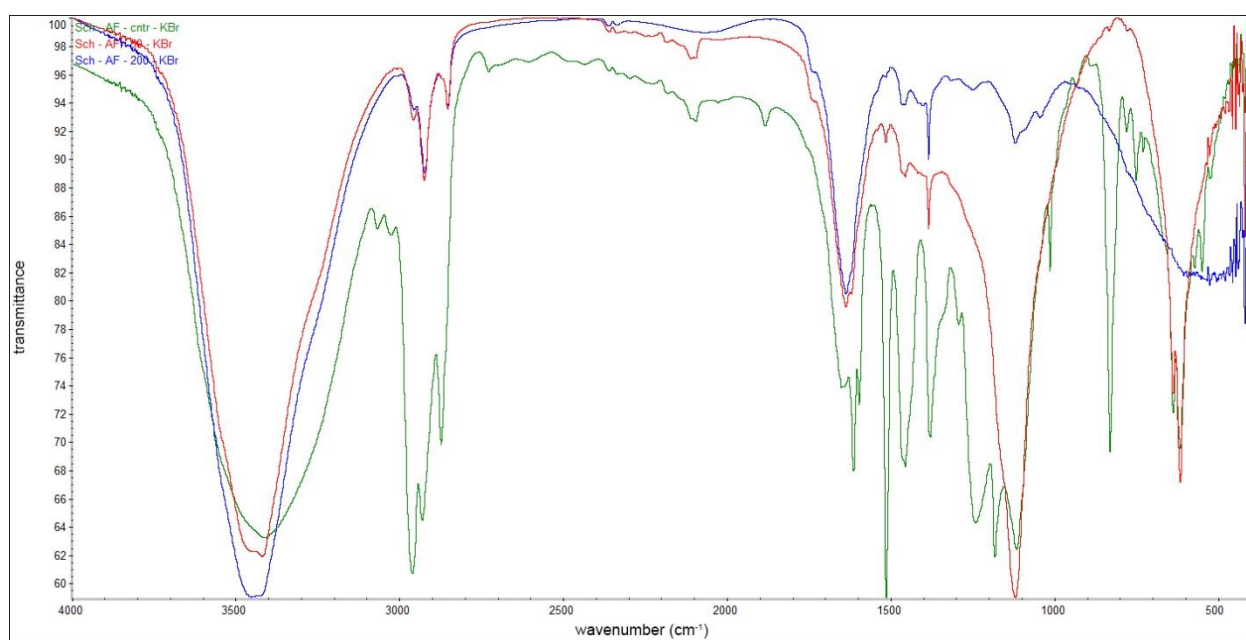

**Figure S4.** IR-spectra Isononylphenol: control treatment (green line) and after *Sch. commune* degradation (1 week – blue and 2 weeks – red lines)
